# Supplementary material for: Mechanistic insights into Ag+induced size-growth from [Au6(DPPP)4]2+to [Au7(DPPP)4]2+clusters
Source: Royal Society of Chemistry journal article supplement (doi:10.1039/d2na00301e), 2022-01-01
Supplement: d2na00301e1.pdf [file d2na00301e1.pdf]

### The definition of coordination number (CN)

The coordination number (CN) of Au-Au bonds was calculated according to the definition of connectivity proposed by Pei and Ma.<sup>[1]</sup> In detail, for each Au-Au bond, CN is 1, 0.75, 0.5, 0.25 and 0 when  $R_{\text{Au-Au}}$  (i.e. Au-Au distance) ranges from  $\leq 3.1$ , (3.1, 3.2], (3.2,3.3], (3.3,3.4], and  $>3.4$  Å. Due to the similar atomic radii of Au and Ag atoms, CN of Au-Ag bond is defined as the same as Au-Au bonds. Meanwhile, the connectivity of Au-P bond is 1, 0.75, 0.5, 0.25 and 0 when  $R_{\text{Au-P}}$  ranges from  $\leq 2.4$ , (2.4, 2.45], (2.45, 2.5], (2.5, 2.55], and  $>2.55$  Å.

### References

1. C. Liu, Y. Pei, H. Sun, *et al.*, The Nucleation and Growth Mechanism of Thiolate-Protected Au Nanoclusters. *J. Am. Chem. Soc.* 2015, **137**, 15809-15816.

**Table S1.** The Hirshfeld charge of metal atoms in **Au<sub>6</sub>P<sub>8</sub>**, **Au<sub>6</sub>AgP<sub>8</sub>-2**, **Au<sub>6</sub>Ag<sub>2</sub>P<sub>8</sub>-4**, **Au<sub>6</sub>Ag<sub>3</sub>P<sub>8</sub>-2**, and **Au<sub>6</sub>Ag<sub>4</sub>P<sub>8</sub>-1** structures, the charge of Au<sup>5</sup> and Au<sup>6</sup> was highlighted in blue.

|                                                      | <b>Au<sub>6</sub>P<sub>8</sub></b> | <b>Au<sub>6</sub>AgP<sub>8</sub>-2</b> | <b>Au<sub>6</sub>Ag<sub>2</sub>P<sub>8</sub>-4</b> | <b>Au<sub>6</sub>Ag<sub>3</sub>P<sub>8</sub>-2</b> | <b>Au<sub>6</sub>Ag<sub>4</sub>P<sub>8</sub>-1</b> |
|------------------------------------------------------|------------------------------------|----------------------------------------|----------------------------------------------------|----------------------------------------------------|----------------------------------------------------|
| Au <sup>1</sup>                                      | -0.023                             | -0.018                                 | -0.003                                             | 0.034                                              | 0.052                                              |
| Au <sup>2</sup>                                      | -0.023                             | -0.008                                 | 0.009                                              | 0.026                                              | 0.037                                              |
| Au <sup>3</sup>                                      | -0.031                             | 0.032                                  | -0.008                                             | 0.033                                              | 0.037                                              |
| Au <sup>4</sup>                                      | -0.044                             | -0.021                                 | -0.003                                             | 0.024                                              | 0.057                                              |
| <b>Au<sup>5</sup></b>                                | <b>0.002</b>                       | <b>0.057</b>                           | <b>0.086</b>                                       | <b>0.114</b>                                       | <b>0.143</b>                                       |
| <b>Au<sup>6</sup></b>                                | <b>-0.009</b>                      | <b>0.035</b>                           | <b>0.083</b>                                       | <b>0.109</b>                                       | <b>0.116</b>                                       |
| Ag <sup>1</sup>                                      | -                                  | 0.077                                  | 0.057                                              | 0.123                                              | 0.179                                              |
| Ag <sup>2</sup>                                      | -                                  | -                                      | 0.062                                              | 0.107                                              | 0.137                                              |
| Ag <sup>3</sup>                                      | -                                  | -                                      | -                                                  | 0.144                                              | 0.076                                              |
| Ag <sup>4</sup>                                      | -                                  | -                                      | -                                                  | -                                                  | 0.324                                              |
| <sup>a</sup> Avg. of M <sub>n</sub>                  | -0.021                             | 0.022                                  | 0.035                                              | 0.079                                              | 0.116                                              |
| <sup>b</sup> Avg. of Au <sub>4</sub> Ag <sub>n</sub> | -0.030                             | -0.012                                 | 0.019                                              | 0.070                                              | 0.112                                              |

Note: <sup>a</sup>Avg. of M<sub>n</sub> designates the average Hirshfeld charge of all metal atoms, while <sup>b</sup>Avg. of Au<sub>4</sub>Ag<sub>n</sub> denotes the average Hirshfeld charge of a core structure comprising Au<sup>1-4</sup> and all Ag atoms (Au<sup>5</sup> and Au<sup>6</sup> are excluded for their low coordination number with the other metal atoms).

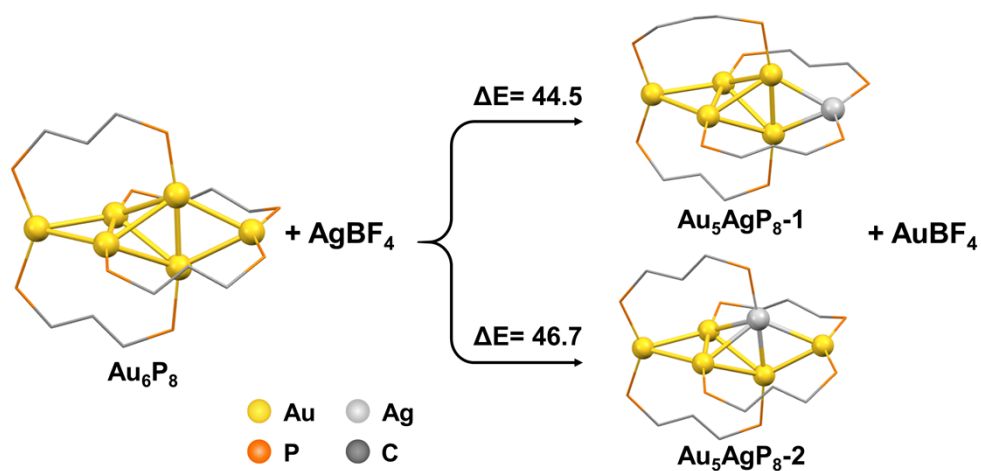

**Scheme S1.** The metal exchange of  $\text{Ag}^+$  with  $\text{Au}^+$  in  $\text{Au}_6\text{P}_8$

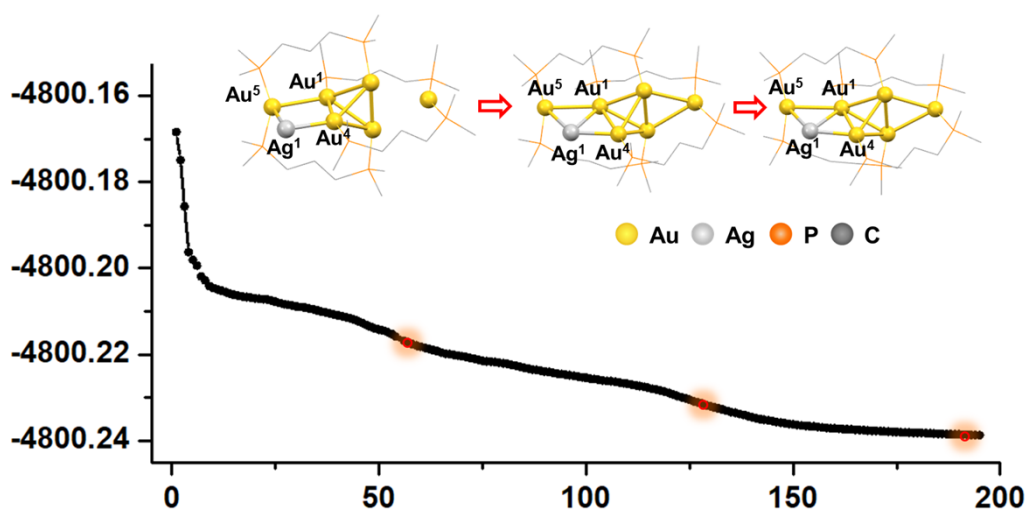

**Figure S1.** Geometry optimization energy profile of  $\text{Au}_6\text{AgP}_8-2$  and the selected intermediate structures.

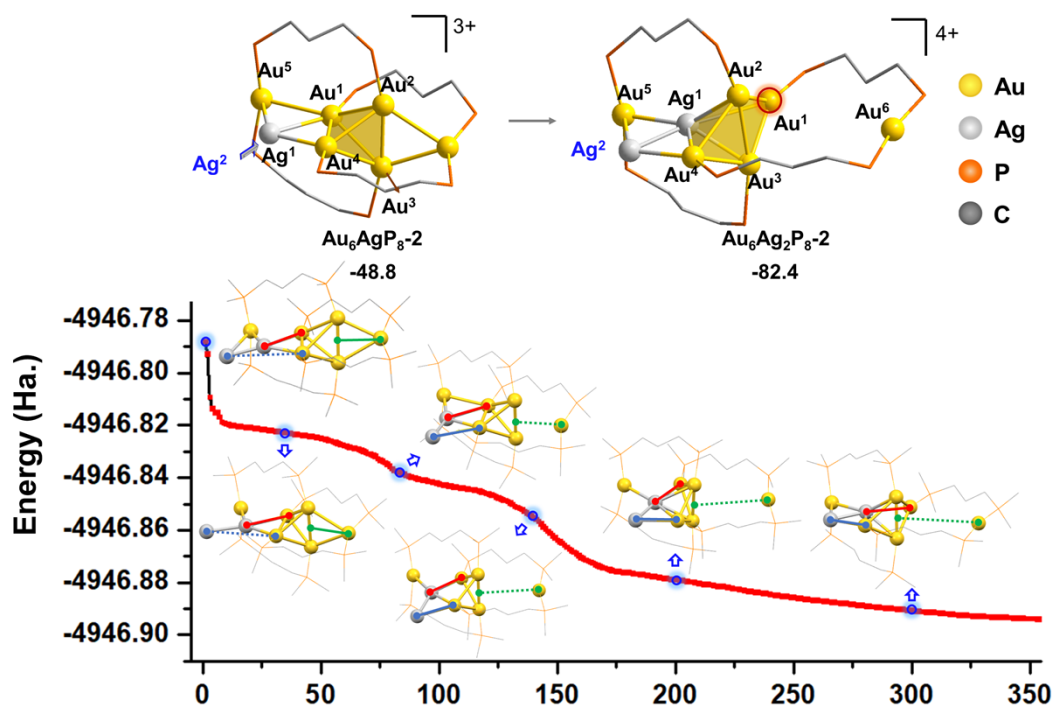

Figure S2. Geometry optimization energy profile of  $\text{Au}_6\text{Ag}_2\text{P}_8-2$  and the selected intermediate structures.

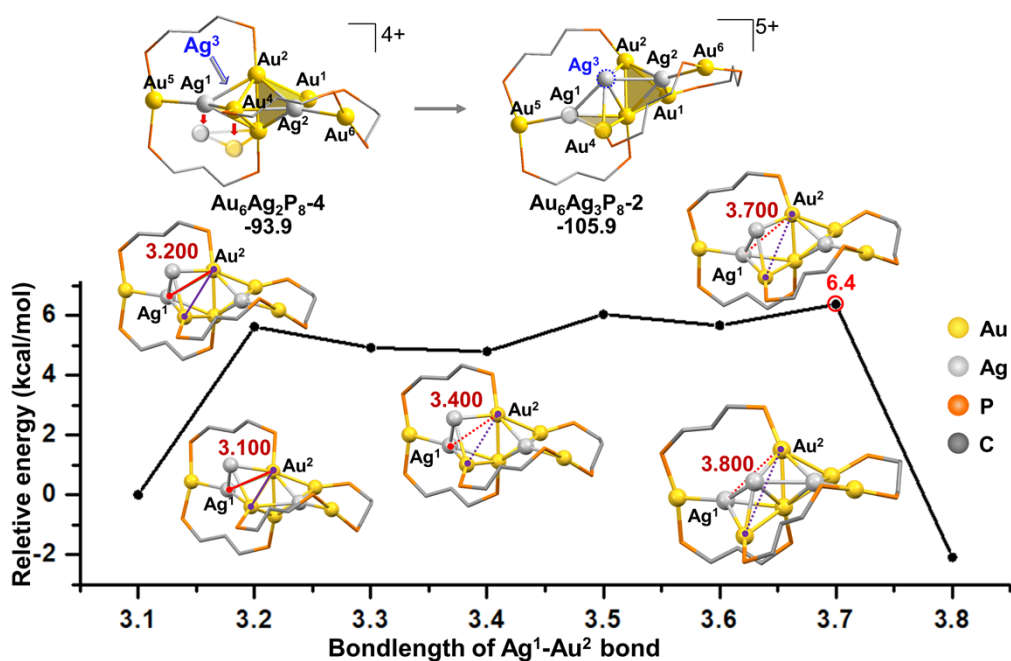

Figure S3. Constrained optimization profile by fixing  $\text{Ag}^1\text{-Au}^2$  bond at different distances, and inset: illustrative diagram for the structural changes via inserting  $\text{Ag}^3$  into the  $\text{Au}^2\text{-Ag}^1$  bond.

**Table S2.** The CN of metal atoms in **Au<sub>6</sub>P<sub>8</sub>**, **Au<sub>6</sub>AgP<sub>8</sub>-2**, **Au<sub>6</sub>Ag<sub>2</sub>P<sub>8</sub>-4**, **Au<sub>6</sub>Ag<sub>3</sub>P<sub>8</sub>-1/2/3/4**, and **Au<sub>6</sub>Ag<sub>4</sub>P<sub>8</sub>-1** structures, the charge of Au<sup>5</sup> and Au<sup>6</sup> was highlighted in blue.

|                                                      | <b>Au<sub>6</sub>P<sub>8</sub></b> | <b>Au<sub>6</sub>AgP<sub>8</sub>-2</b> | <b>Au<sub>6</sub>Ag<sub>2</sub>P<sub>8</sub>-4</b> | <b>Au<sub>6</sub>Ag<sub>3</sub>P<sub>8</sub>-1</b> | <b>Au<sub>6</sub>Ag<sub>3</sub>P<sub>8</sub>-2</b> | <b>Au<sub>6</sub>Ag<sub>3</sub>P<sub>8</sub>-3</b> | <b>Au<sub>6</sub>Ag<sub>3</sub>P<sub>8</sub>-4</b> | <b>Au<sub>6</sub>Ag<sub>4</sub>P<sub>8</sub>-1</b> |
|------------------------------------------------------|------------------------------------|----------------------------------------|----------------------------------------------------|----------------------------------------------------|----------------------------------------------------|----------------------------------------------------|----------------------------------------------------|----------------------------------------------------|
| Au <sup>1</sup>                                      | 4 (5)                              | 5 (6)                                  | 4 (5)                                              | 3 (4)                                              | 3 (4)                                              | 2 (3)                                              | 3 (4)                                              | 3 (4)                                              |
| Au <sup>2</sup>                                      | 4 (5)                              | 4 (5)                                  | 5 (6)                                              | 6 (7)                                              | 4 (5)                                              | 4 (5)                                              | 5.75 (6.75)                                        | 5 (6)                                              |
| Au <sup>3</sup>                                      | 4 (5)                              | 5 (6)                                  | 5 (6)                                              | 4 (5)                                              | 6 (7)                                              | 4 (5)                                              | 4 (5)                                              | 5 (6)                                              |
| Au <sup>4</sup>                                      | 4 (5)                              | 4 (5)                                  | 4 (5)                                              | 4 (5)                                              | 3 (4)                                              | 4 (5)                                              | 3.25 (4.25)                                        | 3 (4)                                              |
| <b>Au<sup>5</sup></b>                                | <b>2 (4)</b>                       | <b>2 (4)</b>                           | <b>1 (3)</b>                                       |
| <b>Au<sup>6</sup></b>                                | <b>2 (4)</b>                       | <b>2 (4)</b>                           | <b>1 (3)</b>                                       |
| Ag <sup>1</sup>                                      | -                                  | 3 (3)                                  | 4 (4)                                              | 4 (4)                                              | 4 (4)                                              | 4 (4)                                              | 4 (4)                                              | 5 (5)                                              |
| Ag <sup>2</sup>                                      | -                                  | -                                      | 5 (5)                                              | 5 (5)                                              | 4 (4)                                              | 3 (3)                                              | 4 (4)                                              | 5 (5)                                              |
| Ag <sup>3</sup>                                      | -                                  | -                                      | -                                                  | 3 (3)                                              | 5 (5)                                              | 5 (5)                                              | 4 (4)                                              | 5 (5)                                              |
| Ag <sup>4</sup>                                      | -                                  | -                                      | -                                                  | -                                                  | -                                                  | -                                                  | -                                                  | 3 (3)                                              |
| <sup>a</sup> Avg. of M <sub>n</sub>                  | 3.3 (4.7)                          | 3.6 (4.7)                              | 3.6 (4.6)                                          | 3.4 (4.3)                                          | 3.4 (4.3)                                          | 3.1 (4.0)                                          | 3.3 (4.2)                                          | 3.6 (4.4)                                          |
| <sup>b</sup> Avg. of Au <sub>4</sub> Ag <sub>n</sub> | 4.0 (5.0)                          | 4.2 (5.0)                              | 4.5 (5.2)                                          | 4.1 (4.7)                                          | 4.1 (4.7)                                          | 3.7 (4.3)                                          | 4.0 (4.6)                                          | 4.3 (4.8)                                          |

Note: <sup>a</sup>Avg. of M<sub>n</sub> designates the average coordination number of all-metal atoms without the coordination of P, while <sup>b</sup>Avg. of Au<sub>4</sub>Ag<sub>n</sub> denotes the average coordination number of a core structure comprising Au<sup>1-4</sup> and all Ag atoms (Au<sup>5</sup> and Au<sup>6</sup> are excluded for their low coordination number with the other metal atoms). The values in brackets refer to the case where P coordination is considered.

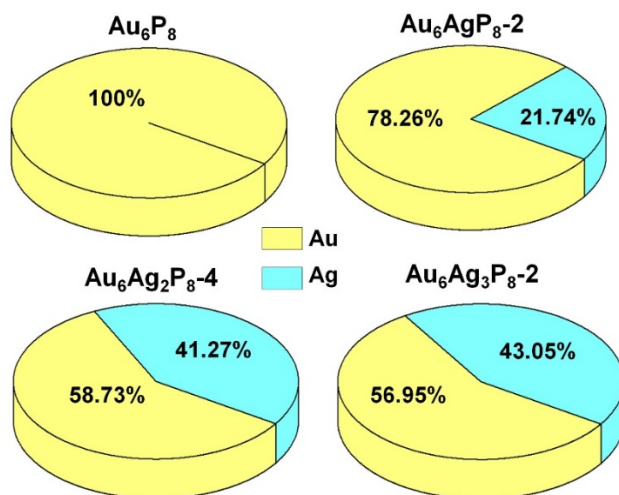

**Scheme S2.** The contribution of Au and Ag components in HOMO of  $\text{Au}_6\text{Ag}_n$  ( $n=0, 1, 2$  and  $3$ ) cores in different clusters.

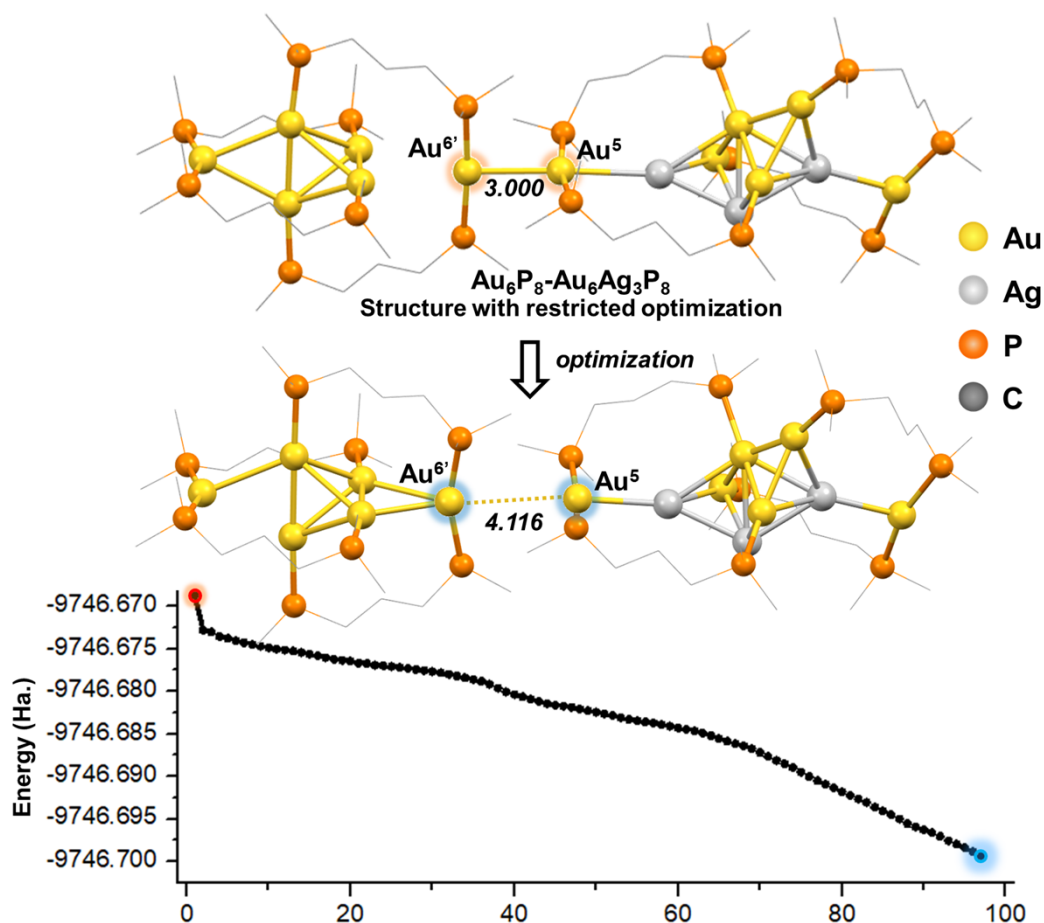

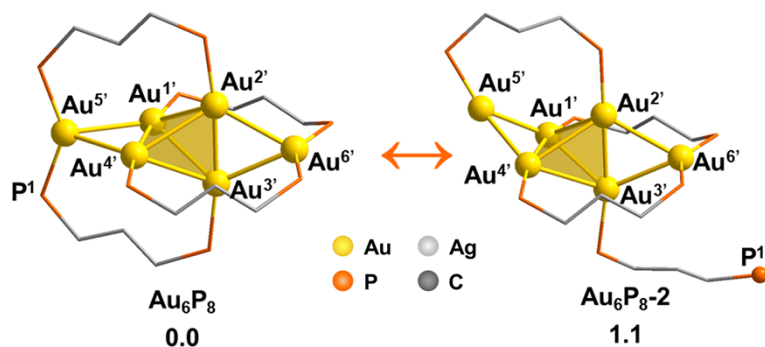

**Figure S5.** The process of  $\text{Au}_6\text{P}_8$  to  $\text{Au}_6\text{P}_8\text{-2}$ . The terminal  $\text{Au}^{5'}$  and  $\text{P}^1$  atoms were both active for the subsequent size-growth process.

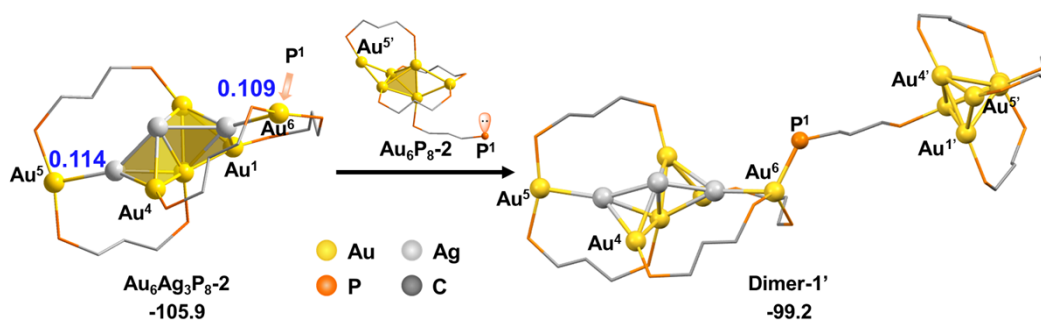

**Scheme S3.** The energy and structure change after the reaction of  $\text{Au}_6\text{P}_8\text{-2}$  with  $\text{Au}_6\text{Ag}_3\text{P}_8\text{-2}$  by coordination of  $\text{P}^1$  to  $\text{Au}^6$  atom.

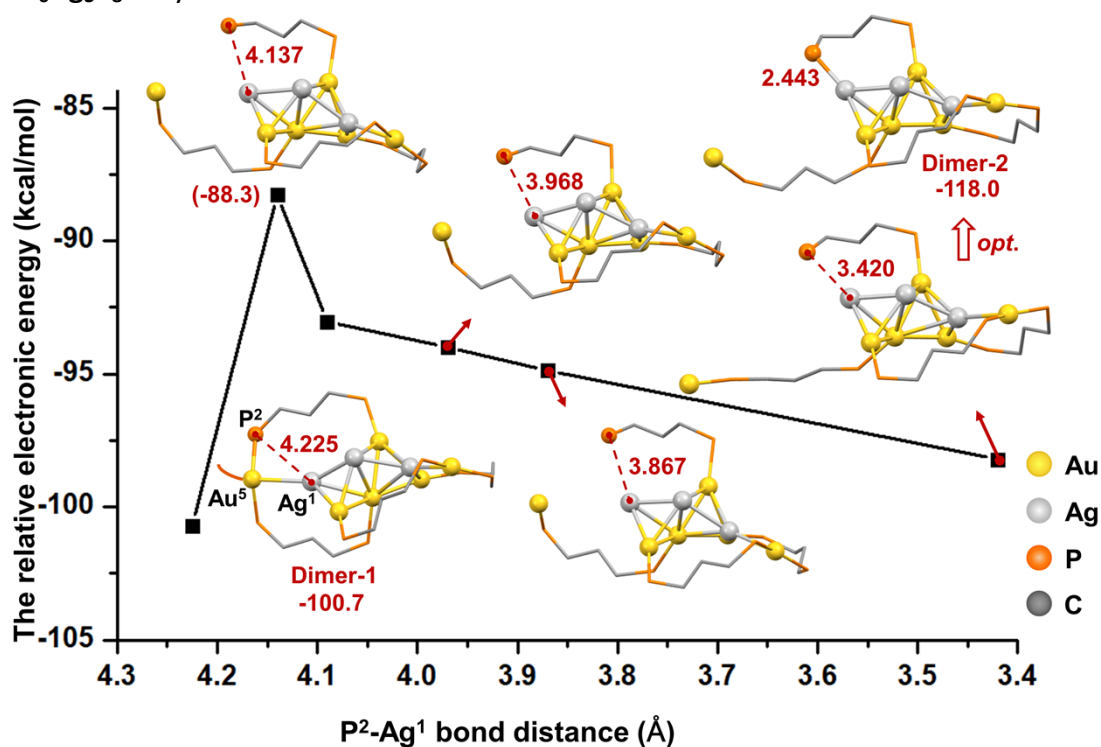

**Figure S6.** The energy profile for the 1,2- $\text{P}^2$  migration during the transformation from **Dimer-1** to **Dimer-2**. Each structure is partially optimized at a given  $\text{P}^2\text{-Ag}^1$  bond length. For clarity, only the alloy cluster block has been shown.

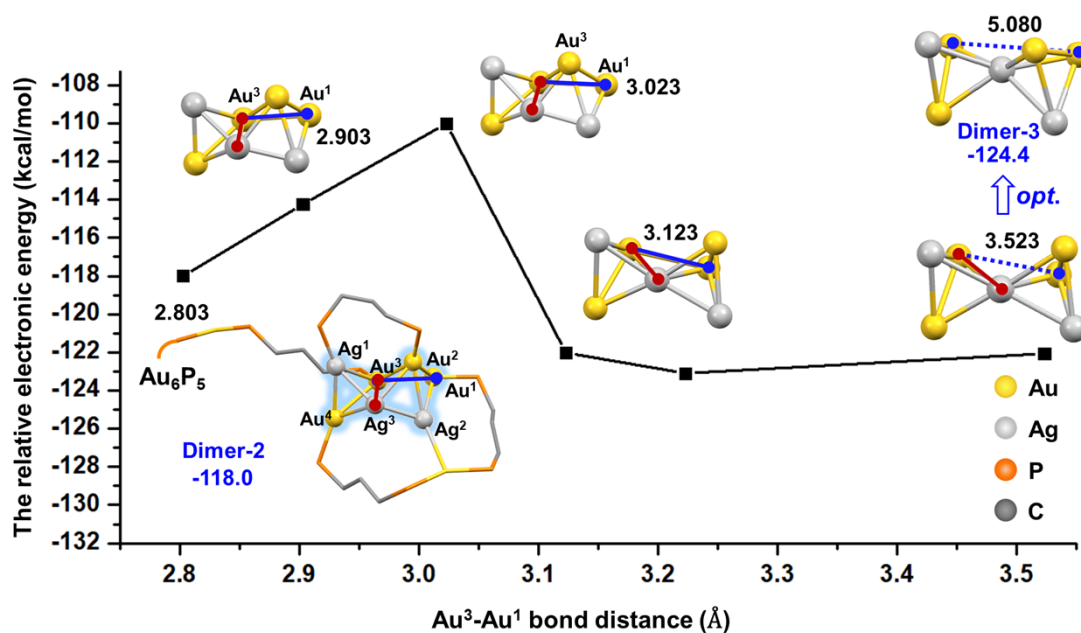

**Figure S7.** The partial optimization energy profile from **Dimer-2** to **Dimer-3** via fixing the Au<sup>3</sup>-Au<sup>1</sup> bond at different distances. Except for the changing Ag<sub>4</sub>Ag<sub>3</sub> blocks, all other structures were omitted.

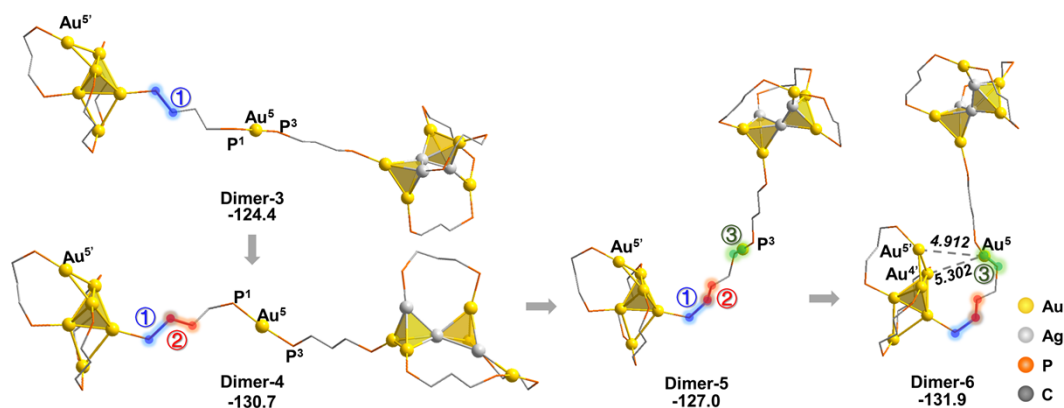

**Figure S8.** The process of **Dimer-3** to **Dimer-6**. The arms of the dangling P~P were highlighted in different colors and labeled with numbers.



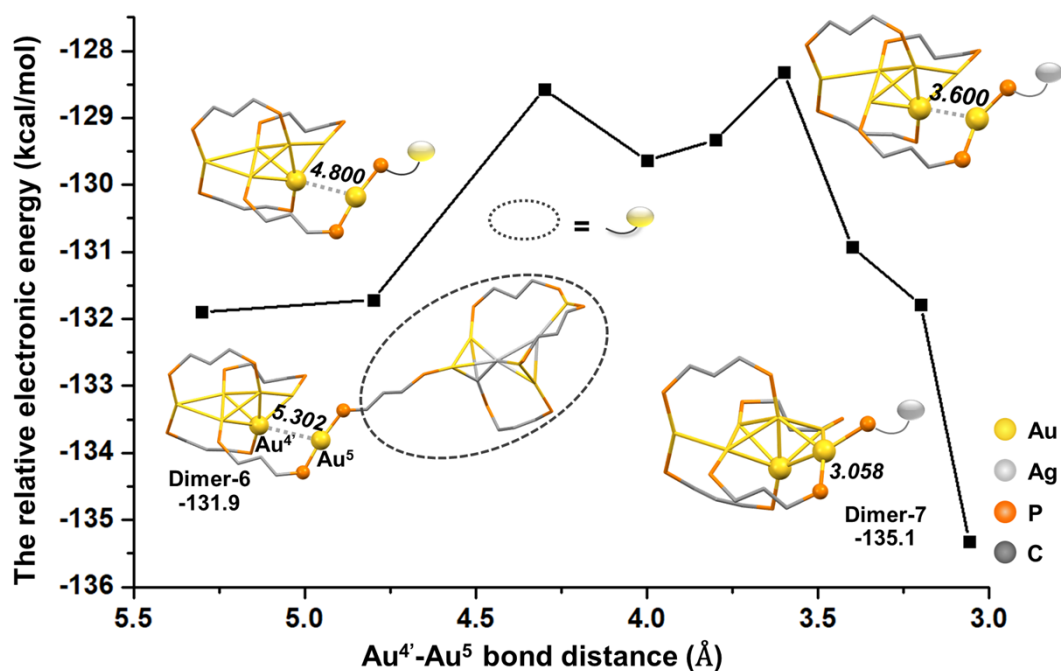

**Figure S9.** The energy profile for the Au-Au formation from **Dimer-6** to **Dimer-7**. The remained part of **Dimer-6** was omitted. Each restricted optimization was performed with the fixed bond length of Au<sup>4+</sup>-Au<sup>5+</sup>.

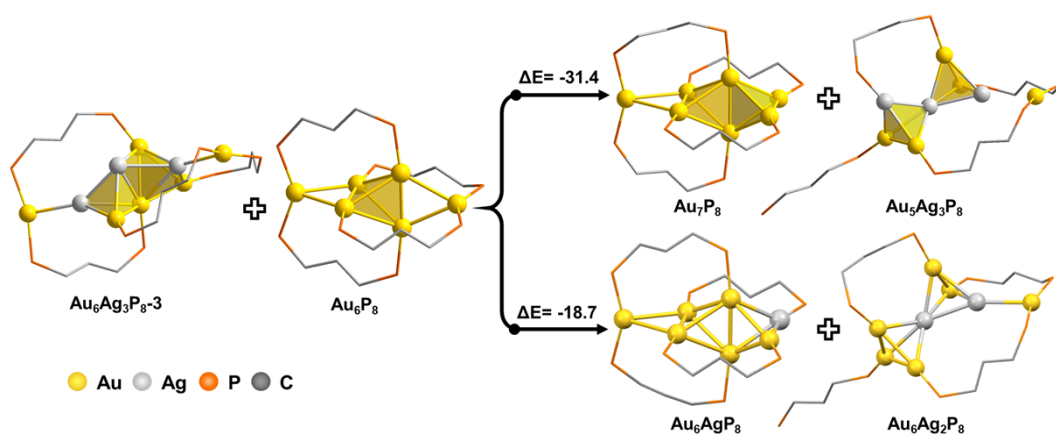

**Scheme S3.** The comparison between reactions of  $\text{Au}_6\text{Ag}_3\text{P}_8\text{-3} + \text{Au}_6\text{P}_8 \rightarrow \text{Au}_7\text{P}_8 + \text{Au}_5\text{Ag}_3\text{P}_8$  and  $\text{Au}_6\text{Ag}_3\text{P}_8\text{-3} + \text{Au}_6\text{P}_8 \rightarrow \text{Au}_6\text{AgP}_8 + \text{Au}_6\text{Ag}_2\text{P}_8$ .

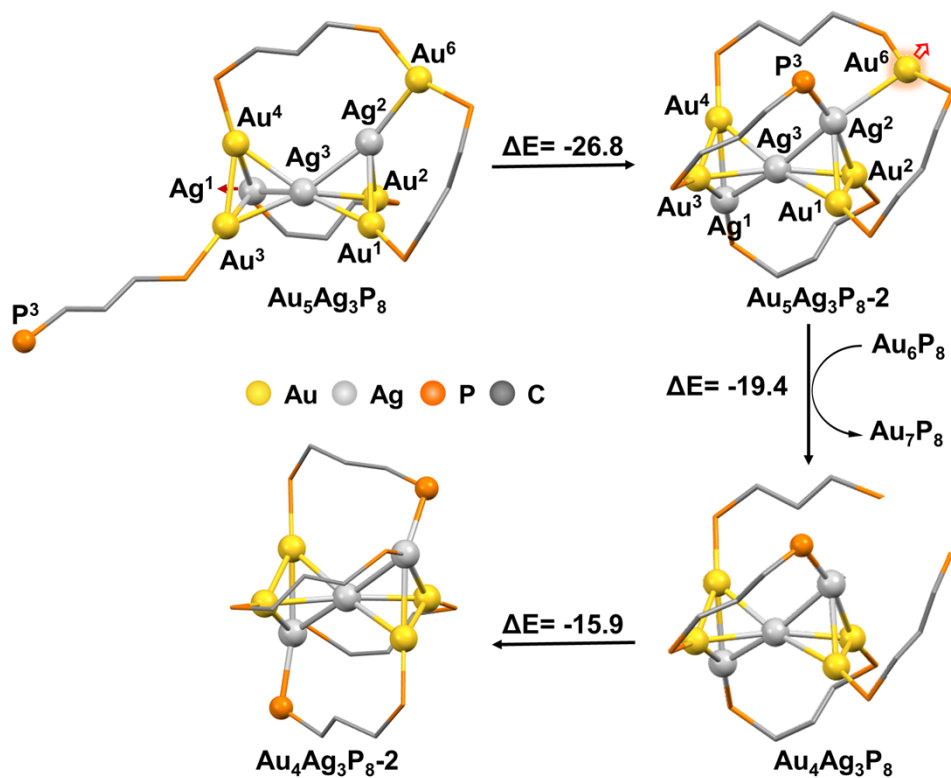

**Scheme S4.** The reaction from  $\text{Au}_5\text{Ag}_3\text{P}_8$  to  $\text{Au}_5\text{Ag}_3\text{P}_8-2$  and the possible further size-conversion.

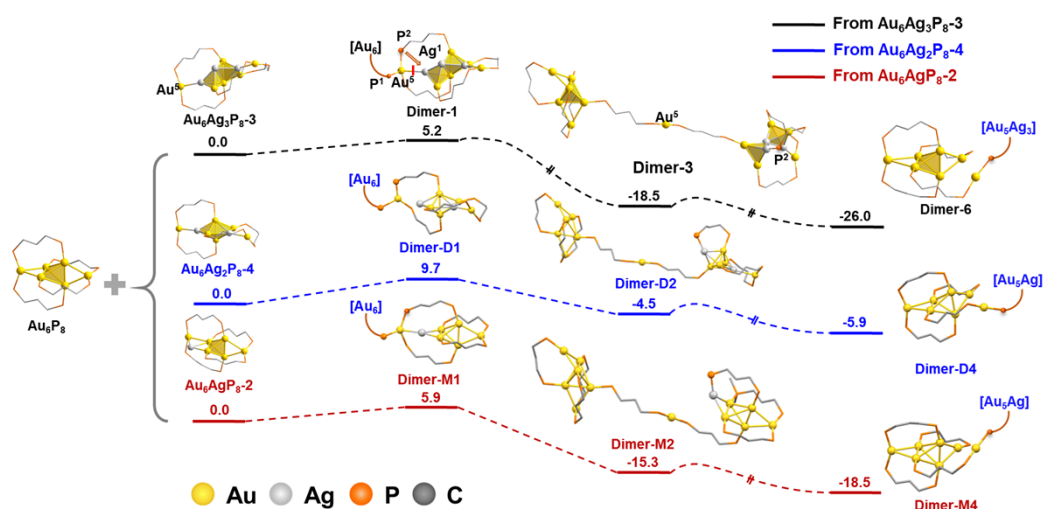

**Scheme S5.** The possible pathways of size-growth from  $\text{Au}_6\text{Ag}_3\text{P}_8-3$ ,  $\text{Au}_6\text{Ag}_2\text{P}_8-4$ , and  $\text{Au}_6\text{AgP}_8-2$ . The independent  $\text{Au}_6\text{P}_8$  and each  $\text{Au}_6\text{Ag}_n$  species were set as the reference for each pathway.
